# Supplementary material
Source: publisher figshare collection journal article supplement (https://rs.figshare.com/ndownloader/files/15136832)
Supplement: Supplementary file 1 [file 15136832]

**Table S2**. Pairwise *F*ST with all loci n=1,174. Significant values (p<0.05) are bolded. Significant values after sequential Bonferroni corrections are indicated in bold and underlined.

|  | NRS | DJI | OMA | DGA | ZAN | MAY | JNO |
| --- | --- | --- | --- | --- | --- | --- | --- |
| NRS | **** |  |  |  |  |  |  |
| DJI | **0.0071** | **** |  |  |  |  |  |
| OMA | **0.0074** | **0.0095** | **** |  |  |  |  |
| DGA | **0.0124** | **0.0141** | **0.0231** | **** |  |  |  |
| ZAN | **0.0107** | **0.0084** | **0.0131** | -0.0013 | **** |  |  |
| MAY | **0.0042** | **0.0120** | **0.0153** | **0.0010** | -0.001 | **** |  |
| JNO | **0.0079** | **0.0136** | **0.0109** | **0.0028** | -0.002 | -0.0031 | **** |
